# Supplementary material for: Multiday production of condensing organic aerosol mass in urban and forest outflow
Source: Copernicus journal article supplement (doi:10.5194/acp-15-595-2015), 2015-01-16
Supplement: Supplementary file 1 [file acp-15-595-2015-supplement.pdf]

Supplement of Atmos. Chem. Phys., 15, 595–615, 2015  
<http://www.atmos-chem-phys.net/15/595/2015/>  
doi:10.5194/acp-15-595-2015-supplement  
© Author(s) 2015. CC Attribution 3.0 License.

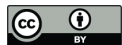

*Supplement of*

## **Multiday production of condensing organic aerosol mass in urban and forest outflow**

**J. Lee-Taylor et al.**

*Correspondence to:* J. Lee-Taylor (julial@ucar.edu)

1 Supplementary Material

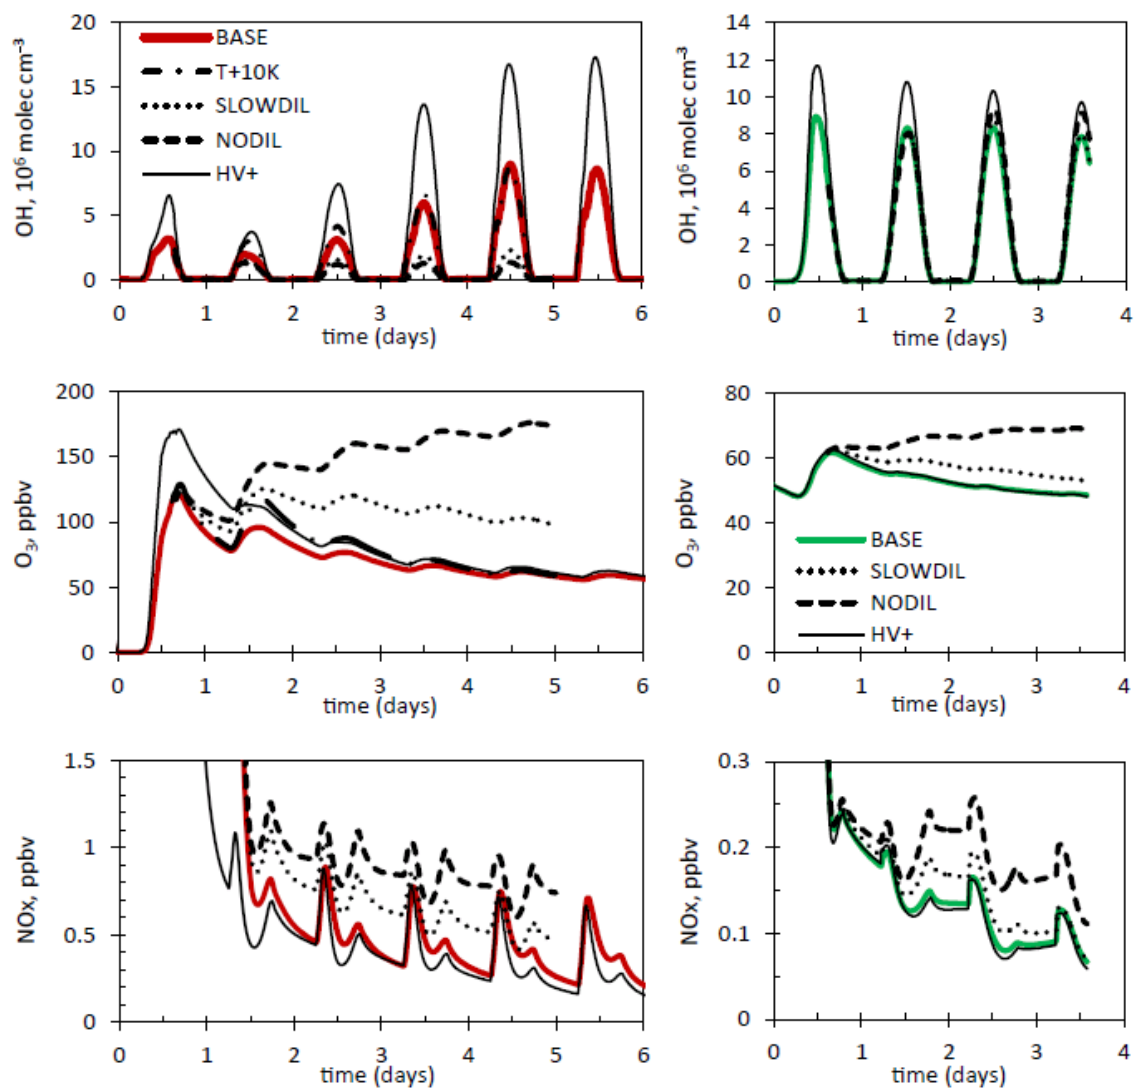

2  
3 Figure S1. Timeseries of major oxidants. Left panels show the urban scenario, right panels show the  
4 forest scenario. All panels show the reference case and sensitivity cases SLOWDIL, NODIL and HV+.  
5 Left panels also show case T+10K.
